# Supplementary material for: Heat stress illness outcomes and annual indices of outdoor heat at U.S. Army installations
Source: PubMed Central journal article supplement (PMC9683623; doi:10.1371/journal.pone.0263803), 2022-11-23
Supplement: pone.0263803.s001.pdf [file pone.0263803.s001.pdf]

# PLOS ONE

## Heat Stress Illness Outcomes and Annual Indices of Outdoor Heat at U.S. Army Installations --Manuscript Draft--

|                                                                                                                                                                                                                                                                                                                                                                                                                                                                                              |                                                                                                                                                                                                                                                                                                                                                                                                                                                                                                                                                                                                                                                                                                                                                                                                                                                                                                                                                                                                                                                                       |
|----------------------------------------------------------------------------------------------------------------------------------------------------------------------------------------------------------------------------------------------------------------------------------------------------------------------------------------------------------------------------------------------------------------------------------------------------------------------------------------------|-----------------------------------------------------------------------------------------------------------------------------------------------------------------------------------------------------------------------------------------------------------------------------------------------------------------------------------------------------------------------------------------------------------------------------------------------------------------------------------------------------------------------------------------------------------------------------------------------------------------------------------------------------------------------------------------------------------------------------------------------------------------------------------------------------------------------------------------------------------------------------------------------------------------------------------------------------------------------------------------------------------------------------------------------------------------------|
| <b>Manuscript Number:</b>                                                                                                                                                                                                                                                                                                                                                                                                                                                                    | PONE-D-22-02473                                                                                                                                                                                                                                                                                                                                                                                                                                                                                                                                                                                                                                                                                                                                                                                                                                                                                                                                                                                                                                                       |
| <b>Article Type:</b>                                                                                                                                                                                                                                                                                                                                                                                                                                                                         | Research Article                                                                                                                                                                                                                                                                                                                                                                                                                                                                                                                                                                                                                                                                                                                                                                                                                                                                                                                                                                                                                                                      |
| <b>Full Title:</b>                                                                                                                                                                                                                                                                                                                                                                                                                                                                           | Heat Stress Illness Outcomes and Annual Indices of Outdoor Heat at U.S. Army Installations                                                                                                                                                                                                                                                                                                                                                                                                                                                                                                                                                                                                                                                                                                                                                                                                                                                                                                                                                                            |
| <b>Short Title:</b>                                                                                                                                                                                                                                                                                                                                                                                                                                                                          | Heat Stress Illness Outcomes and Annual Indices of Outdoor Heat at U.S. Army Installations                                                                                                                                                                                                                                                                                                                                                                                                                                                                                                                                                                                                                                                                                                                                                                                                                                                                                                                                                                            |
| <b>Corresponding Author:</b>                                                                                                                                                                                                                                                                                                                                                                                                                                                                 | Stephen Archie Lewandowski, MPhil, SM<br>Uniformed Services University of the Health Sciences<br>Bethesda, MD UNITED STATES                                                                                                                                                                                                                                                                                                                                                                                                                                                                                                                                                                                                                                                                                                                                                                                                                                                                                                                                           |
| <b>Keywords:</b>                                                                                                                                                                                                                                                                                                                                                                                                                                                                             | climate; heat stress; heat stroke; heat exhaustion; military; environmental health                                                                                                                                                                                                                                                                                                                                                                                                                                                                                                                                                                                                                                                                                                                                                                                                                                                                                                                                                                                    |
| <b>Abstract:</b>                                                                                                                                                                                                                                                                                                                                                                                                                                                                             | <p>This study characterized associations between annually scaled thermal indices and annual heat stress illness (HSI) morbidity outcomes, including heat stroke and heat exhaustion, among active-duty soldiers at ten Continental U.S. (CONUS) Army installations from 1991 to 2018. We fit negative binomial models for 3 types of HSI morbidity outcomes and 104 annual indices, adjusting for installation-level effects and long-term trends with a block bootstrap approach. Ambulatory (out-patient) and reportable event HSI outcomes displayed positive association patterns with the assessed annual indices of heat in our models. For example, a one-degree Fahrenheit (°F) increase in mean temperature between May and September was associated with a 1.05 (95% confidence interval [CI]: 1.00, 1.11) times greater rate of ambulatory encounters. The annual-scaled rate ratios and their uncertainties may be applied to climate projections for a wide range of thermal indices to estimate future HSI burden and impacts to medical readiness.</p> |
| <b>Order of Authors:</b>                                                                                                                                                                                                                                                                                                                                                                                                                                                                     | Stephen Archie Lewandowski, MPhil, SM<br>Marianthi-Anna Kioumourtzoglou, ScD<br>Jeffrey L. Shaman, PhD                                                                                                                                                                                                                                                                                                                                                                                                                                                                                                                                                                                                                                                                                                                                                                                                                                                                                                                                                                |
| <b>Additional Information:</b>                                                                                                                                                                                                                                                                                                                                                                                                                                                               |                                                                                                                                                                                                                                                                                                                                                                                                                                                                                                                                                                                                                                                                                                                                                                                                                                                                                                                                                                                                                                                                       |
| <b>Question</b>                                                                                                                                                                                                                                                                                                                                                                                                                                                                              | <b>Response</b>                                                                                                                                                                                                                                                                                                                                                                                                                                                                                                                                                                                                                                                                                                                                                                                                                                                                                                                                                                                                                                                       |
| <b>Financial Disclosure</b><br><br>Enter a financial disclosure statement that describes the sources of funding for the work included in this submission. Review the <a href="#">submission guidelines</a> for detailed requirements. View published research articles from <a href="#">PLOS ONE</a> for specific examples.<br><br>This statement is required for submission and <b>will appear in the published article</b> if the submission is accepted. Please make sure it is accurate. | <p>The opinions and assertions expressed herein are those of the authors and do not necessarily reflect the official policy or position of the Uniformed Services University or the Department of Defense. S.L. was supported by the U.S. Army Long Term Health Education and Training (LTHET) program. J.S. and Columbia University disclose partial ownership of SK Analytics. J.S. also reports receiving consulting fees from Merck and BNI. The funders had no role in study design, data collection and analysis, decision to publish, or preparation of the manuscript.</p>                                                                                                                                                                                                                                                                                                                                                                                                                                                                                    |

**Unfunded studies**

Enter: *The author(s) received no specific funding for this work.*

**Funded studies**

Enter a statement with the following details:

- Initials of the authors who received each award
- Grant numbers awarded to each author
- The full name of each funder
- URL of each funder website
- Did the sponsors or funders play any role in the study design, data collection and analysis, decision to publish, or preparation of the manuscript?
- **NO** - Include this sentence at the end of your statement: *The funders had no role in study design, data collection and analysis, decision to publish, or preparation of the manuscript.*
- **YES** - Specify the role(s) played.

\* typeset

**Competing Interests**

Use the instructions below to enter a competing interest statement for this submission. On behalf of all authors, disclose any [competing interests](#) that could be perceived to bias this work—acknowledging all financial support and any other relevant financial or non-financial competing interests.

This statement is **required** for submission and **will appear in the published article** if the submission is accepted. Please make sure it is accurate and that any funding sources listed in your Funding Information later in the submission form are also declared in your Financial Disclosure statement.

View published research articles from [PLOS ONE](#) for specific examples.

The authors have declared that no competing interests exist.

**NO authors have competing interests**

Enter: *The authors have declared that no competing interests exist.*

**Authors with competing interests**

Enter competing interest details beginning with this statement:

*I have read the journal's policy and the authors of this manuscript have the following competing interests: [insert competing interests here]*

\* typeset

**Ethics Statement**

N/A

Enter an ethics statement for this submission. This statement is required if the study involved:

- Human participants
- Human specimens or tissue
- Vertebrate animals or cephalopods
- Vertebrate embryos or tissues
- Field research

Write "N/A" if the submission does not require an ethics statement.

General guidance is provided below. Consult the [submission guidelines](#) for detailed instructions. **Make sure that all information entered here is included in the Methods section of the manuscript.**

**Format for specific study types**

**Human Subject Research (involving human participants and/or tissue)**

- Give the name of the institutional review board or ethics committee that approved the study
- Include the approval number and/or a statement indicating approval of this research
- Indicate the form of consent obtained (written/oral) or the reason that consent was not obtained (e.g. the data were analyzed anonymously)

**Animal Research (involving vertebrate animals, embryos or tissues)**

- Provide the name of the Institutional Animal Care and Use Committee (IACUC) or other relevant ethics board that reviewed the study protocol, and indicate whether they approved this research or granted a formal waiver of ethical approval
- Include an approval number if one was obtained
- If the study involved *non-human primates*, add *additional details* about animal welfare and steps taken to ameliorate suffering
- If anesthesia, euthanasia, or any kind of animal sacrifice is part of the study, include briefly which substances and/or methods were applied

**Field Research**

Include the following details if this study involves the collection of plant, animal, or other materials from a natural setting:

- Field permit number
- Name of the institution or relevant body that granted permission

**Data Availability**

Authors are required to make all data underlying the findings described fully available, without restriction, and from the time of publication. PLOS allows rare exceptions to address legal and ethical concerns. See the [PLOS Data Policy](#) and [FAQ](#) for detailed information.

No - some restrictions will apply

A Data Availability Statement describing where the data can be found is required at submission. Your answers to this question constitute the Data Availability Statement and **will be published in the article**, if accepted.

**Important:** Stating 'data available on request from the author' is not sufficient. If your data are only available upon request, select 'No' for the first question and explain your exceptional situation in the text box.

Do the authors confirm that all data underlying the findings described in their manuscript are fully available without restriction?

**Describe where the data may be found in full sentences. If you are copying our sample text, replace any instances of XXX with the appropriate details.**

- If the data are **held or will be held in a public repository**, include URLs, accession numbers or DOIs. If this information will only be available after acceptance, indicate this by ticking the box below. For example: *All XXX files are available from the XXX database (accession number(s) XXX, XXX).*
- If the data are all contained **within the manuscript and/or Supporting Information files**, enter the following: *All relevant data are within the manuscript and its Supporting Information files.*
- If neither of these applies but you are able to provide **details of access elsewhere**, with or without limitations, please do so. For example:

*Data cannot be shared publicly because of [XXX]. Data are available from the XXX Institutional Data Access / Ethics Committee (contact via XXX) for researchers who meet the criteria for access to confidential data.*

*The data underlying the results presented in the study are available from (include the name of the third party*

Climate index data are available from <https://doi.org/10.5281/zenodo.5903145>. Outcome data are available from the Defense Medical Epidemiology Database (DMED) at <https://www.health.mil/Military-Health-Topics/Combat-Support/Armed-Forces-Health-Surveillance-Division/Data-Management-and-Technical-Support/Defense-Medical-Epidemiology-Database>. DMED is available to authorized users such as U.S. military medical providers, epidemiologists, medical researchers, safety officers or medical operations/ clinical support staff for surveying health conditions in the U.S. military. Civilian collaborators in military medical research and operations may also have access to DMED with documentation supporting their arrangements.

*and contact information or URL).*

- This text is appropriate if the data are owned by a third party and authors do not have permission to share the data.

\* typeset

Additional data availability information:

# Heat Stress Illness Outcomes and Annual Indices of Outdoor Heat at U.S. Army Installations

Stephen A. Lewandowski<sup>1,2, #a\*</sup>, Marianthi-Anna Kioumourtzoglou<sup>1</sup>, Jeffrey L. Shaman<sup>1</sup>

<sup>1</sup> Department of Environmental Health Sciences, Columbia University Mailman School of Public Health, New York, New York, United States of America

<sup>2</sup> Department of Preventive Medicine and Biostatistics, Uniformed Services University of the Health Sciences, Bethesda, Maryland, United States of America

<sup>#a</sup> Current Address: Department of Preventive Medicine and Biostatistics, Uniformed Services University of the Health Sciences, Bethesda, Maryland, United States of America

\* Corresponding author

E-mail: [stephen.lewandowski@usuhs.edu](mailto:stephen.lewandowski@usuhs.edu) (SL)

13

Acknowledgements / Disclosures.

The opinions and assertions expressed herein are those of the authors and do not necessarily reflect the official policy or position of the Uniformed Services University or the Department of Defense. S.L. was supported by the U.S. Army Long Term Health Education and Training (LTHET) program. J.S. and Columbia University disclose partial ownership of SK Analytics. J.S. also reports receiving consulting fees from Merck and BNI.

20

21

## 22 **Abstract**

23           This study characterized associations between annually scaled thermal indices and annual  
24 heat stress illness (HSI) morbidity outcomes, including heat stroke and heat exhaustion, among  
25 active-duty soldiers at ten Continental U.S. (CONUS) Army installations from 1991 to 2018. We  
26 fit negative binomial models for 3 types of HSI morbidity outcomes and 104 annual indices,  
27 adjusting for installation-level effects and long-term trends with a block bootstrap approach.  
28 Ambulatory (out-patient) and reportable event HSI outcomes displayed positive association  
29 patterns with the assessed annual indices of heat in our models. For example, a one-degree  
30 Fahrenheit (°F) increase in mean temperature between May and September was associated with a  
31 1.05 (95% confidence interval [CI]: 1.00, 1.11) times greater rate of ambulatory encounters. The  
32 annual-scaled rate ratios and their uncertainties may be applied to climate projections for a wide  
33 range of thermal indices to estimate future HSI burden and impacts to medical readiness.

## 34 **Introduction**

35           Heat stress illnesses (HSIs) pose a preventable, potentially fatal, health threat with serious  
36 impacts to military training and readiness [1,2]. HSIs occur when the effects of environmental  
37 heat stress, combined with metabolic heat generated from physical activity, exceed  
38 thermoregulatory and heat exchange capacities, resulting in elevated core temperature [3]. This  
39 heat strain manifests as a continuum of outcomes, including heat stroke, heat exhaustion, edema,  
40 cramps, and fainting. In the U.S. Army,  diagnosed cases of heat stroke and heat exhaustion have  
41 increased in recent years as average annual temperatures and high temperature records continue  
42 to rise [4,5]. Military service members who train in the Continental U.S. (CONUS) experience



43 elevated risks from heat exposure compared to similar age groups in the general population due  
44 to increased time outdoors, high physical exertion levels, clothing burden, and equipment loads.

45         The environmental properties affecting heat exchange include air temperature, air  
46 humidity, wind speed, and solar, sky, and ground radiation [3]. A wide range of methods and  
47 indices exist to classify the thermal environment as it relates to thermal stress and physiological  
48 effects [6]. The primary index used by the U.S. Army is the wet bulb globe temperature  
49 (WBGT). The WBGT is a weighted average of natural wet-bulb temperature (weight,  $w=70\%$ ),  
50 globe thermometer temperature ( $w=20\%$ ), and dry-bulb temperature ( $w=10\%$ ) in outdoor, non-  
51 shaded conditions [7]. Another commonly reported metric is the U.S. National Weather  
52 Service's (NWS) heat index. The NWS heat index (HI) represents an apparent temperature  
53 measure of thermal comfort based on air temperature and relative humidity and serves as a basis  
54 for excessive heat warnings [8]. The U.S. Army Public Health Center also applies the NWS HI  
55 as an indicator for heat risk days, defined as days with an HI greater than 90 degrees Fahrenheit  
56 ( $^{\circ}\text{F}$ ) for more than one hour [4]. Although the WBGT and HI are most often applied to short-  
57 term (hourly, daily, heat wave event) exposures, averages or aggregates from these instruments  
58 can also assist with characterization of long-term (seasonal, annual) heat and humidity risks.

59         The objective of this study was to characterize the association between indices of heat  
60 and annual HSI morbidity outcomes among active-duty soldiers at ten CONUS Army  
61 installations in the context of rising temperature and humidity conditions. Resulting estimates for  
62 the sensitivity of health outcomes to changing environmental conditions can inform long-term  
63 planning assumptions and provide a basis for evaluating the effectiveness of prevention  
64 measures.

## 65 **Materials and Methods**

### 66 **Health Outcome Data**

67 We obtained HSI outcome counts and rates of hospitalization (in-patient), ambulatory  
68 visits (out-patient), and reportable medical events from the Defense Medical Epidemiology  
69 Database (DMED), which contains summarized, non-Privacy Act data from the Defense Medical  
70 Surveillance System (DMSS) [9]. We queried primary diagnosis International Classification of  
71 Diseases (ICD) codes for active-duty U.S. Army servicemembers. For ICD-9, used through  
72 2015, we applied 992-series codes, categorized as “effects of heat and light” [10]. We used ICD-  
73 10 series T67 codes for 2016 – 2018 data [11]. The counts and rates in this study aggregate all  
74 conditions within these code groups, with heat stroke and heat exhaustion representing the  
75 majority of cases across each of the three outcome types. Hospitalization data were available  
76 from 1990 – 2018, ambulatory from 1997 – 2018, and reportable events from 1995 – 2018. We  
77 excluded the initial years for hospitalizations and ambulatory encounters (1990 and 1997,  
78 respectively) from analyses due to signs of incomplete reporting. Additionally, we queried  
79 injuries and illnesses of all types to consider potential long-term trends due to changes in  
80 reporting systems or access-to-care and to assess the relative burden of disease due to HSIs. We  
81 selected ten U.S. Army CONUS installations based on previously reported *Medical Surveillance*  
82 *Monthly Report (MSMR)* HSI rates and exploratory DMED findings [1]. The ten included  
83 locations account for over 78% of all CONUS active-duty Army HSI cases for the examined  
84 years. Fort Irwin, CA, the next highest location, reported less than half the HSI cases as the tenth

85 ranked site, Fort Bliss, TX, and features rotational training cycles at its National Training Center  
86 that challenge exposure assumptions.

## 87 **Meteorology Data**

88 Meteorological estimates from the North American Land Data Assimilation System 2  
89 (NLDAS-2) forcing dataset served as the primary source of weather and atmospheric data[12].  
90 NLDAS is a National Aeronautics and Space Administration (NASA) / National Oceanic and  
91 Atmospheric Administration (NOAA)-led multi-institution project that constructs gridded  
92 surface meteorological datasets through the assimilation and merging of fields derived from  
93 gauge-based and remotely-sensed observations and re-analyses, with validation from ground-  
94 based observations [12]. NLDAS-2 data are available on a 1/8<sup>th</sup>-degree spatial scale at hourly  
95 frequencies from 1979 to present. We selected NLDAS grid cells containing the centroid of each  
96 installation based on shapefiles from the Department of Defense (DoD) Military Installations,  
97 Ranges, and Training Areas (MIRTA) Dataset [13].

98 NLDAS fields include air temperature at 2 meters above the surface, specific humidity at  
99 2 meters above the surface, surface pressure, wind speed, and bias-corrected surface downward  
100 shortwave radiation. We calculated relative humidity from specific humidity, temperature, and  
101 atmospheric pressure; heat index (HI) from temperature and relative humidity based on a US  
102 National Weather Service algorithm[8]; and outdoor WBGT from air temperature, relative  
103 humidity, solar irradiance, barometric pressure, and wind speed using the method of Liljegren *et*  
104 *al.*, based on principles of heat and mass transfer [14,15]. We conducted sensitivity analyses  
105 comparing NLDAS centroid estimates with eleven years of hourly data produced by the 14<sup>th</sup>  
106 Weather Squadron from nearest weather station  and observed consistency in line with the  
107 distance to the station.

108 We compiled 104 annual indices of heat through multiple aggregations of hourly  
109 temperature, HI, and WBGT estimates in absolute and relative terms, averaged either over the  
110 entire calendar year or the heat season, defined as 01 May through 30 September. We included  
111 the former full-year average, as a prior evaluation assessed that approximately 17% of all HSI  
112 cases occurred during non-summer months, variable by location [16]. Absolute measures  
113 included annual mean temperatures and counts of heat risk days or hours above specified  
114 thresholds based on heat category cut-offs for HI and WBGT. Mean values were calculated over  
115 24-hour periods to capture minimum temperatures, which can impact recovery from heat  
116 exposure. We calculated relative measures with reference to 1990 to 2019 climatologies for each  
117 day of the year and each location. These relative indices included annual mean daily anomalies,  
118 annual maximum daily anomalies, counts of days above daily 85<sup>th</sup>, 90<sup>th</sup>, and 95<sup>th</sup>  
119 percentiles (mean and maximum values), and counts of days one or two standard deviations  
120 above daily temperature climate norms for mean and maximum values.

121

## 122 **Statistical Analyses**

123 To evaluate time trends in our exposure metrics, we fit linear models regressing each  
124 index of heat on time for each installation. We evaluated outcome measures in a similar manner,  
125 with simple linear regressions for rates of each outcome type over time, by installation and with  
126 combined rates ( $\frac{\text{sum of counts}}{\text{sum of population}}$ ) for all ten installations.

127 We applied negative binomial regression to model the over-dispersed count outcomes for  
128 hospitalizations, ambulatory encounters, and reportable events [17]. The index of heat served as  
129 the exposure of interest, in units of °F, number of days, or number of hours. We set indicator

130 variables for each installation to account for potentially confounding factors varying across  
 131 installations and set the active-duty Army population of each installation for each year as an  
 132 offset. Our resulting regression formula for the log of the rate predicted by the exposure and  
 133 installation indicator variables is:  $\log\left(\frac{\widehat{outcome\ count}_i}{\widehat{population}_i}\right) = \widehat{\beta}_0 + \widehat{\beta}_1 index\ value +$   
 134  $\sum_{j=2}^{10} \widehat{\beta}_j I(\text{installation}_i = j)$ , with Fort Bliss, TX set as the reference installation. We  
 135 accounted for confounding by year, which is associated with long-term trends in both the  
 136 exposure and outcome, by applying a block bootstrap approach that shuffles replicated selections  
 137 of the data to reduce effects of serial correlation [18]. The time variable includes elements which  
 138 we are limited in our ability to decompose, such as changes in access to care, admission  
 139 protocols, coding practices, and reporting systems in addition to soldier demographics, fitness  
 140 levels, and training intensities. We hypothesize that if we were to only include *year* as a term in a  
 141 standard model without a blocked bootstrap approach, the trend would capture a portion of the  
 142 outcome variability associated with the changes in heat we are investigating and bias estimates  
 143 towards the null, while failure to adjust for trends through time in any manner would bias results  
 144 away from the null.

145 To construct block bootstraps, we randomly selected two-year intervals with replacement  
 146 and assembled these intervals into a new series with the approximate length of the base time  
 147 series. We conducted 10,000 replications of this process on select indices for each model  
 148 (represented in Fig 2), calculated beta coefficients for each iteration, and constructed  
 149 nonparametric basic (empirical) bootstrap confidence intervals [19,20]. For the remainder of  
 150 indices, we conducted 2,000 bootstrap replications. We assessed sensitivity by comparing non-  
 151 bootstrap models (with and without a year term), original single observation bootstraps, and  
 152 three-year block interval bootstraps. In the two-year block models, we also examined bias-

153 corrected and accelerated (BCa) bootstrap intervals, which incorporate parameters for the  
 154 proportion of bootstrap estimates less than the observed statistic and for the skewness of the  
 155 bootstrap distribution [21]. We conducted all statistical and spatial analyses using R Statistical  
 156 Software (version 3.6.1) [22]. The R code is available at [https://github.com/sal2222/annual\\_hsi](https://github.com/sal2222/annual_hsi).

## 157 Results

158 We found that CONUS active-duty Army HSI ambulatory and reportable event rates  
 159 increased over the study period. Assessing outcome patterns for all types of injuries and  
 160 illnesses, we observed that ambulatory rates sharply increased over time and hospitalization rates  
 161 generally declined from 1991 to 1997 and then steadied. Reportable event rates displayed  
 162 random variability but were the most stable outcome measure over time. The mean counts and  
 163 rates for each installation are listed in Table 1, along with mean burden, representing the percent  
 164 of all encounters or events attributed to HSIs. Fourteen installation-outcome type pairs exhibited  
 165 a positive, linear trend for annual rate at  $\alpha = 0.05$  over the included years and two had a negative  
 166 trend. Fig 1 displays the positive trends of the combined HSI rates from the ten installations over  
 167 time ( $p < 0.001$  for ambulatory and reportable event regression slopes,  $p = 0.12$  for  
 168 hospitalizations).

169 **Table 1. Heat stress illness outcomes (all HSI types).**

| Installation     | Ambulatory (1998-2018) |                            |                    | Hospitalization (1991-2018) |                          |                    | Reportable Events (1995-2018) |                          |                    |
|------------------|------------------------|----------------------------|--------------------|-----------------------------|--------------------------|--------------------|-------------------------------|--------------------------|--------------------|
|                  | Mean Count (SD)        | Mean Rate (SD)             | Mean Burden % (SD) | Mean Count (SD)             | Mean Rate (SD)           | Mean Burden % (SD) | Mean Count (SD)               | Mean Rate (SD)           | Mean Burden % (SD) |
| Fort Bliss, TX   | 28.33 (16.6)           | 1.57 (0.58) <sup>a</sup>   | 0.01 (0.00)        | 1.75 (1.88)                 | 0.11 (0.12) <sup>b</sup> | 0.10 (0.09)        | 3.50 (3.88)                   | 0.22 (0.23)              | 0.63 (0.68)        |
| Fort Benning, GA | 535.48 (290.58)        | 26.51 (15.00) <sup>a</sup> | 0.15 (0.05)        | 38.00 (20.14)               | 1.93 (0.96) <sup>a</sup> | 2.52 (1.52)        | 67.38 (54.45)                 | 3.42 (2.84) <sup>a</sup> | 18.69 (11.43)      |
| Fort Bragg, NC   | 702.52 (271.78)        | 15.51 (5.28) <sup>a</sup>  | 0.13 (0.05)        | 31.00 (13.01)               | 0.72 (0.31)              | 1.04 (0.53)        | 140.83 (60.03)                | 3.21 (1.41)              | 11.57 (5.51)       |

|                       |                 |                            |             |              |                          |             |               |                          |               |
|-----------------------|-----------------|----------------------------|-------------|--------------|--------------------------|-------------|---------------|--------------------------|---------------|
| Fort Campbell, KY     | 191.76 (12.63)  | 6.81 (4.08) <sup>a</sup>   | 0.05 (0.02) | 10.00 (5.48) | 0.38 (0.19)              | 0.54 (0.31) | 45.08 (37.7)  | 1.59 (1.35) <sup>a</sup> | 6.77 (6.04)   |
| Fort Hood, TX         | 110.81 (36.94)  | 2.68 (1.03) <sup>a</sup>   | 0.02 (0.01) | 7.71 (4.09)  | 0.19 (0.11) <sup>a</sup> | 0.24 (0.15) | 27.46 (25.12) | 0.64 (0.56)              | 1.33 (0.90)   |
| Fort Jackson, SC      | 265.29 (202.53) | 27.84 (22.31) <sup>a</sup> | 0.13 (0.09) | 3.25 (2.88)  | 0.34 (0.32)              | 0.38 (0.38) | 52.92 (83.18) | 5.63 (9.09) <sup>a</sup> | 13.22 (17.25) |
| Fort Leonard Wood, MO | 59.86 (51.3)    | 6.24 (5.50)                | 0.03 (0.02) | 3.21 (2.56)  | 0.36 (0.29)              | 0.39 (0.38) | 7.00 (5.79)   | 0.76 (0.65)              | 3.70 (4.12)   |
| Fort Polk, LA         | 74.67 (49.06)   | 9.21 (6.24) <sup>a</sup>   | 0.06 (0.03) | 4.64 (3.01)  | 0.53 (0.38)              | 0.72 (0.63) | 22.00 (23.8)  | 2.77 (3.09) <sup>a</sup> | 8.35 (7.98)   |
| Fort Riley, KS        | 42.67 (27.28)   | 2.89 (1.54)                | 0.02 (0.01) | 1.71 (1.65)  | 0.12 (0.11) <sup>a</sup> | 0.17 (0.16) | 8.96 (5.74)   | 0.67 (0.42)              | 2.60 (1.94)   |
| Fort Stewart, GA      | 69.57 (40.98)   | 4.22 (2.44) <sup>a</sup>   | 0.03 (0.01) | 7.86 (15.67) | 0.58 (1.38) <sup>b</sup> | 0.57 (0.93) | 18.71 (17.68) | 1.14 (1.08)              | 2.88 (2.12)   |

170 Rates are per 1,000 persons per year. Burden is calculated as the percentage of HSI encounters  
 171 compared to the total of all documented injuries and illnesses.

172 <sup>a</sup> Positive linear regression slope for HSI rate over year at  $\alpha = 0.05$ .

173 <sup>b</sup> Negative linear regression slope for HSI rate over year at  $\alpha = 0.05$ .

174 **Fig 1. Combined HSI outcome rates for ten CONUS Army installations.** The line represents  
 175 a linear model and the shaded area models 95% confidence levels. Note that the scales vary by  
 176 outcome category by orders of magnitude.

177 We also detected positive long term (decadal) trends among many indices of heat,  
 178 compiled over the entire calendar year or restricted to heat season months, across a majority of  
 179 major CONUS Army installations. Table 2 displays summary statistics for a focused selection of  
 180 indices and highlights indices with significant positive linear time trends at  $\alpha = 0.05$ . Among 104  
 181 reviewed indices, representing 1,040 index-installation pairs, 599 pairs had significant positive  
 182 slopes between 1991 – 2018 (57.6%). Note that three of the indices (30 pairs) reflect daily  
 183 standard deviations and, thus, reflect temperature variability rather than mean temperature. Four  
 184 index-installation pairs displayed negative slopes: minimum daily indices over the full year at  
 185 Fort Riley, KS (temperature, WBGT, HI) and Fort Stewart, GA (WBGT).

186 **Table 2. Summary of select annual indices of heat (1991-2018).**

| Installation          | Full Year                        |                                 |                           | Heat Season (May - September)    |                                 |                           |
|-----------------------|----------------------------------|---------------------------------|---------------------------|----------------------------------|---------------------------------|---------------------------|
|                       | Temperature<br>(°F)<br>Mean (SD) | Heat Index<br>(°F)<br>Mean (SD) | WBGT<br>(°F)<br>Mean (SD) | Temperature<br>(°F)<br>Mean (SD) | Heat Index<br>(°F)<br>Mean (SD) | WBGT<br>(°F)<br>Mean (SD) |
| Fort Bliss, TX        | 49.97 (1.26) <sup>a</sup>        | 49.59 (1.29)<br>a               | 48.49 (1.16)<br>a         | 66.14 (1.33) <sup>a</sup>        | 66.29 (1.52)<br>a               | 64.63 (1.27)<br>a         |
| Fort Benning, GA      | 66.30 (1.08) <sup>a</sup>        | 67.02 (1.18)<br>a               | 63.43 (1.00)<br>a         | 79.64 (1.39) <sup>a</sup>        | 82.53 (1.69)<br>a               | 76.15 (0.95)<br>a         |
| Fort Bragg, NC        | 59.02 (1.31) <sup>a</sup>        | 59.36 (1.39)<br>a               | 56.89 (1.13)              | 74.82 (1.60) <sup>a</sup>        | 76.84 (1.94)<br>a               | 72.35 (1.26)              |
| Fort Campbell, KY     | 62.98 (0.91) <sup>a</sup>        | 60.75 (0.87)<br>a               | 54.31 (0.80)              | 75.67 (1.16)                     | 73.98 (1.02)                    | 64.92 (0.74)              |
| Fort Hood, TX         | 64.92 (1.21) <sup>a</sup>        | 65.42 (1.26)<br>a               | 62.21 (1.02)<br>a         | 78.89 (1.54) <sup>a</sup>        | 81.29 (1.71)<br>a               | 75.44 (0.98)<br>a         |
| Fort Jackson, SC      | 55.93 (1.82) <sup>a</sup>        | 55.59 (1.70)<br>a               | 52.39 (1.28)              | 74.84 (2.27) <sup>a</sup>        | 75.49 (2.11)<br>a               | 69.86 (1.22)              |
| Fort Leonard Wood, MO | 54.58 (1.08) <sup>a</sup>        | 52.73 (0.97)<br>a               | 47.98 (0.76)              | 71.12 (1.48)                     | 69.35 (1.31)                    | 62.42 (0.84)              |
| Fort Polk, LA         | 66.77 (1.08) <sup>a</sup>        | 63.84 (1.03)<br>a               | 55.49 (0.76)              | 82.45 (1.43) <sup>a</sup>        | 79.29 (1.30)<br>a               | 66.33 (0.91)              |
| Fort Riley, KS        | 51.50 (1.23)                     | 50.64 (1.23)                    | 50.65 (1.13)              | 60.93 (1.32)                     | 60.47 (1.44)                    | 60.28 (1.19)              |
| Fort Stewart, GA      | 63.31 (1.49) <sup>a</sup>        | 62.75 (1.31)<br>a               | 58.13 (0.96)              | 80.53 (2.35) <sup>a</sup>        | 81.05 (1.94)<br>a               | 73.04 (0.90)              |

187 <sup>a</sup> Positive linear regression slope at  $\alpha = 0.05$ , i.e. a warming trend.

188

189 In our focused analysis of temperature, HI, and WBGT annual means (Fig 2), we found  
190 positive associations with ambulatory visits (rate ratio; RR > 1) at  $\alpha = 0.05$  for heat-season  
191 temperature and HI, positive associations with hospitalizations for heat-season WBGT, and  
192 positive associations with reportable event for full-year temperature and heat-season WBGT.  
193 Quantifying our main results, we found that a 1°F increase in mean temperature between May  
194 and September is associated with a 1.05 (95% CI: 1.00, 1.11) times greater rate of ambulatory  
195 encounters among active-duty Army soldiers at CONUS locations, controlling for installation-  
196 specific effects. The same temperature increase was associated with an increase in



197 hospitalization rates by a factor of 1.14 (95% CI: 1.06, 1.21) and a marginal increase in  
 198 reportable event rates by a factor of 1.10 (95% CI: 0.98, 1.23).

199 **Fig 2. Rate ratios for full-year and heat season indices of heat and HSI encounters at 10**  
 200 **CONUS U.S. Army installations.** RRs per 1 degree increase in annual index of heat (mean of  
 201 daily means) from 2-year block bootstrap negative binomial models with basic (empirical)  
 202 confidence intervals based on 10,000 replicates, controlling for installation-level effects. Solid  
 203 points reflect the mean of bootstrap estimates and unfilled points reflect the original sample  
 204 (non-bootstrap) estimate.

205 Out of 312 assessed index-outcome pairs, 142 exhibited positive associations after  
 206 controlling for installation-level effects and time trends (Table 3). WBGT and HI indices were  
 207 more likely to indicate a positive association than temperature-only indices. Indices averaged  
 208 over the full calendar year displayed a higher proportion of positive associations than those  
 209 averaged over heat season months. Indices based on hourly counts above threshold values were  
 210 more likely to show positive associations than indices based on counts of days above thresholds.  
 211 We observed similar associations between anomaly based (relative) and non-anomaly based  
 212 (absolute) indices.

213 **Table 3. Annual scale index-HSI outcome rate ratio 95% confidence interval positions from**  
 214 **2-year block bootstrap negative binomial models.**

|                     | <b>Positive<br/>RR &gt;1<br/>(N=142)</b> | <b>Null<br/>RR = 1<br/>(N=148)</b> | <b>Negative<br/>RR &lt; 1<br/>(N=22)</b> | <b>Total<br/>(N=312)</b> |
|---------------------|------------------------------------------|------------------------------------|------------------------------------------|--------------------------|
| <b>Outcome Type</b> |                                          |                                    |                                          |                          |
| Ambulatory          | 66<br>(63.5%)                            | 37<br>(35.6%)                      | 1 (1.0%)                                 | 104                      |

|                         |               |               |               |     |
|-------------------------|---------------|---------------|---------------|-----|
| Hospitalizations        | 22<br>(21.2%) | 64<br>(61.5%) | 18<br>(17.3%) | 104 |
| Reportable Events       | 54<br>(51.9%) | 47<br>(45.2%) | 3 (2.9%)      | 104 |
| <b>Index Type</b>       |               |               |               |     |
| Temperature             | 29<br>(37.2%) | 44<br>(56.4%) | 5 (6.4%)      | 78  |
| Heat Index              | 55<br>(48.2%) | 48<br>(42.1%) | 11<br>(9.6%)  | 114 |
| WBGT                    | 58<br>(48.3%) | 56<br>(46.7%) | 6 (5.0%)      | 120 |
| <b>Timeframe</b>        |               |               |               |     |
| Full Year               | 83<br>(50.3%) | 73<br>(44.2%) | 9 (5.5%)      | 165 |
| May-Sep                 | 59<br>(40.1%) | 75<br>(51.0%) | 13<br>(8.8%)  | 147 |
| <b>Exposure Measure</b> |               |               |               |     |
| Degree-based            | 38<br>(42.2%) | 45<br>(50.0%) | 7 (7.8%)      | 90  |
| Day-based               | 81<br>(45.0%) | 87<br>(48.3%) | 12<br>(6.7%)  | 180 |
| Hour-based              | 23<br>(54.8%) | 16<br>(38.1%) | 3 (7.1%)      | 42  |
| <b>Anomaly-Based</b>    |               |               |               |     |
| No                      | 60<br>(46.5%) | 60<br>(46.5%) | 9 (7.0%)      | 129 |
| Yes                     | 82<br>(44.8%) | 88<br>(48.1%) | 13<br>(7.1%)  | 183 |

215 Counts (row-wise percentage) from basic (empirical) confidence intervals, controlled for  
216 location-level effects.

217 In our sensitivity analyses of various models, non-bootstrap negative binomial models  
218 adjusted for year returned RR estimates closer to the null than 2-year block bootstrap models.  
219 Results from standard bootstrap models (single year replacement) approximated negative  
220 binomial models without adjustment for year. 3-year block bootstrap models returned wider CIs  
221 than 2-year block models, with mean estimates shifted in both directions.

222

223

224

## 225 Discussion

226 In this study, we identified positive decadal trends among indices of heat and humidity  
227 and among HSI outcomes at active-duty CONUS Army installations. We found overall positive  
228 association patterns for ambulatory and reportable event outcomes with temperature, HI, and  
229 WBGT indices in absolute and relative measures. The largely null finding for hospitalization  
230 associations may be due to the low number of annual HSI admissions at many locations. Five of  
231 the ten CONUS installations averaged fewer than five HSI hospitalizations per year (Table 1).  
232 Considering the relative rarity of diagnosed HSI hospitalizations, the availability of ambulatory  
233 encounter and reportable event data adds substantial value for the characterization of HSI  
234 morbidity.

235 We evaluated multiple combinations of heat and humidity index characteristics (104  
236 indices, 312 total index-outcome pairs) in our negative binomial association model and classified  
237 the resulting RRs as positive, null, or negative. These findings do not necessarily indicate that  
238 sets of indices are more correct than others; rather, they may be more sensitive to detecting  
239 associations at an annual scale in support of our hypotheses that heat indices and HSI outcomes  
240 are related. There is no mechanism for a negative association and we recognize that some  
241 associations in either direction may be due to chance. Overall, the finding that WBGT and HI  
242 indices “outperformed” ambient temperature indices was expected because they capture the  
243 effect of humidity. It was unexpected, however, that indices averaged over the full year would  
244 display a positive association rate greater than those averaged over a defined heat season. This  
245 result furthers evidence for expanding the boundaries of the traditional heat season and  
246 incorporating prevention efforts throughout the year. Among exposure measure types, indices

247 based on counts of hours were more sensitive to a positive association than day-based or degree-  
248 based indices, reflecting a strength of the high-resolution NLDAS-2 dataset.

249         In these analyses, we assumed that the frequencies and intensities of outdoor training  
250 events remained consistent over time for each location and that population-level risk factors did  
251 not fluctuate. We made these assumptions considering that the major unit compositions and  
252 Training and Doctrine Command (TRADOC) and Forces Command (FORSCOM) mission sets  
253 at the selected sites remained mostly stable over the evaluated timeframe. Challenges to this  
254 assumption could occur from installation population changes due to extended large unit overseas  
255 deployments and organizational changes, such as the movement of the Armor School from Fort  
256 Knox, KY to Fort Benning, GA in 2011. Likewise, demographics of age, sex, and ethnicity  
257 among the base population active duty soldiers have not markedly changed, although  
258 generational change in overall fitness levels and body composition represent a risk factor of  
259 concern [23–25]. Additionally, we assumed that HSI prevention measures, including annual  
260 safety training requirements and monitoring of WBGT heat categories with associated work-rest  
261 cycle and hydration recommendations, had not meaningfully varied over the study time-course  
262 [3]. The block bootstrap process to adjust for time trends, along with the inclusion of installation  
263 indicator variables, mitigate these potential changes within and between installations over time.

264         There is also a need to consider whether other time-varying trends account for changes in  
265 reported HSI rates. Changes in access to care, case definitions, and reporting systems and  
266 procedures can all contribute to long-term trends in the outcomes we studied. We observed  
267 impacts from such changes when comparing the rates of all ICD-coded illnesses and injuries  
268 over time, especially for ambulatory rates. The block bootstrap method also controls for this  
269 serial correlation in outcomes. Another limitation with our annually aggregated health outcome

270 counts is that we were unable to discern incident cases from follow-up encounters. The  
271 ambulatory counts and rates are therefore elevated above incidence-based case definition levels;  
272 however, in this aspect they provide representation of the overall burden on the healthcare  
273 system from HSIs.

274 This study assesses the long-term impacts of environmental changes on direct heat-  
275 related morbidity; however, it lacks the within-year temporal resolution needed to inform day-to-  
276 day or operational level decisions. Important short-term exposure parameters include the  
277 intensity, duration, and timing in season of extreme heat events [26]. Further study of HSI  
278 morbidity among physically active populations with outdoor environmental exposures could  
279 examine the short-term exposure-response relationship between heat and humidity indices and  
280 daily outcomes, considering lagged and non-linear effects and controlling for individual-level  
281 risk factors.

## 282 **Conclusion**

283 U.S. Army CONUS installations have broadly experienced rising temperature conditions  
284 and increased rates of HSI morbidity over the past two to three decades. In this study, we  
285 determine that temperature, HI, and WBGT indices are positively associated with rates of  
286 ambulatory encounters and reportable events, controlling for installation-levels effects and  
287 accounting for potential confounding by long-term trends in the outcomes and exposures. The  
288 annual-scaled rate ratios and their uncertainties can be applied to climate projections for a wide  
289 range of thermal indices to estimate future HSI burden and impacts to medical readiness. As an  
290 example, we obtained a RR of 1.05 for ambulatory HSI rates for each °F increase in mean  
291 temperature between May and September. In 2018, the active-duty population of approximately

292 204,291 at the included ten CONUS installations reported 3,612 ambulatory HSI encounters.  
 293 Applying our effect estimate, with a 1 °F increase in the heat season mean temperature, we  
 294 project an increase to 3,793 HSI ambulatory encounters (+181 cases) in the absence of additional  
 295 adaptations or control measures.

## 296 **References**

- 297 1. Armed Forces Health Surveillance Branch. Update: Heat illness, active component, U.S.  
 298 Armed Forces, 2017. *MSMR*. 2018;25: 6–12.
- 299 2. Schickele E. Environment and Fatal Heat Stroke: An Analysis of 157 Cases Occurring in  
 300 the Army in the U. S. During World War II. *Mil Surg*. 1947;100: 235–256.  
 301 doi:10.1093/milmed/100.3.235
- 302 3. Headquarters, Department of the Army and Air Force. Heat Stress Control and Heat  
 303 Casualty Management (TB MED 507/AFPAM 48-152(I)). Washington, D.C.; 2003 Mar.  
 304 Report No.: TB MED 507/AFPAM 48-152(I).
- 305 4. U.S. Army Public Health Center. 2019 Health of the Force. 2020. Available:  
 306 <https://phc.amedd.army.mil/topics/campaigns/hof/Pages/default.aspx>
- 307 5. U.S. Global Change Research Program. Climate Science Special Report: Fourth National  
 308 Climate Assessment, Volume I. U.S. Global Change Research Program, Washington, DC;  
 309 2017. Available: <https://science2017.globalchange.gov/>
- 310 6. Macpherson RK. The Assessment of the Thermal Environment. A Review. *Br J Ind Med*.  
 311 1962;19: 151–164.
- 312 7. Budd GM. Wet-bulb globe temperature (WBGT)—its history and its limitations. *Journal of*  
 313 *Science and Medicine in Sport*. 2008;11: 20–32. doi:10.1016/j.jsams.2007.07.003
- 314 8. Anderson GB, Bell ML, Peng RD. Methods to Calculate the Heat Index as an Exposure  
 315 Metric in Environmental Health Research. *Environ Health Perspect*. 2013;121: 1111–1119.  
 316 doi:10.1289/ehp.1206273
- 317 9. DeFraités RF. The Armed Forces Health Surveillance Center: enhancing the Military  
 318 Health System’s public health capabilities. *BMC Public Health*. 2011;11 Suppl 2: S1.  
 319 doi:10.1186/1471-2458-11-S2-S1
- 320 10. World Health Organization, editor. *The International Classification of Diseases, 9th*  
 321 *Revision, Clinical Modification*. 9th revision, 6th ed. Geneva: World Health Organization;  
 322 2011.

- 323 11. World Health Organization, editor. International Statistical Classification of Diseases and  
324 Related Health Problems. 10th revision. Geneva: World Health Organization; 2019.  
325 Available: <https://icd.who.int/browse10/2019/en>
- 326 12. Xia Y, Mitchell K, Ek M, Sheffield J, Cosgrove B, Wood E, et al. Continental-scale water  
327 and energy flux analysis and validation for the North American Land Data Assimilation  
328 System project phase 2 (NLDAS-2): 1. Intercomparison and application of model products.  
329 *Journal of Geophysical Research: Atmospheres*. 2012;117. doi:10.1029/2011JD016048
- 330 13. Military Installations, Ranges, and Training Areas - Data.gov. 18 Jan 2017 [cited 24 Jan  
331 2021]. Available: [https://catalog.data.gov/dataset/military-installations-ranges-and-training-](https://catalog.data.gov/dataset/military-installations-ranges-and-training-areas)  
332 [areas](https://catalog.data.gov/dataset/military-installations-ranges-and-training-areas)
- 333 14. Liljegren JC, Carhart RA, Lawday P, Tschopp S, Sharp R. Modeling the wet bulb globe  
334 temperature using standard meteorological measurements. *J Occup Environ Hyg*. 2008;5:  
335 645–655. doi:10.1080/15459620802310770
- 336 15. Lemke B, Kjellstrom T. Calculating Workplace WBGT from Meteorological Data: A Tool  
337 for Climate Change Assessment. *Industrial Health*. 2012;50: 267–278.  
338 doi:10.2486/indhealth.MS1352
- 339 16. DeGroot D, Martin R. Within-year Exertional Heat Illness Incidence in U.S. Army  
340 Soldiers, 2008–2012: Fort Belvoir, VA: Defense Technical Information Center; 2015 Jun.  
341 doi:10.21236/ADA621280
- 342 17. Venables WN, Ripley BD. *Modern Applied Statistics with S*. 4th ed. New York: Springer-  
343 Verlag; 2002. doi:10.1007/978-0-387-21706-2
- 344 18. Önöz B, Bayazit M. Block bootstrap for Mann–Kendall trend test of serially dependent  
345 data. *Hydrological Processes*. 2012;26: 3552–3560. doi:10.1002/hyp.8438
- 346 19. Canty A, Ripley BD. *boot: Bootstrap R (S-Plus) Functions*. 2019.
- 347 20. Davison AC, Hinkley DV. *Bootstrap Methods and Their Applications*. Cambridge:  
348 Cambridge University Press; 1997. Available: <http://statwww.epfl.ch/davison/BMA/>
- 349 21. Efron B. Better Bootstrap Confidence Intervals. *Journal of the American Statistical*  
350 *Association*. 1987;82: 171–185. doi:10.1080/01621459.1987.10478410
- 351 22. R Core Team. *R: A Language and Environment for Statistical Computing*. Vienna, Austria:  
352 R Foundation for Statistical Computing; 2019. Available: <https://www.R-project.org/>
- 353 23. Bedno SA, Li Y, Han W, Cowan DN, Scott CT, Cavicchia MA, et al. Exertional heat  
354 illness among overweight U.S. Army recruits in basic training. *Aviat Space Environ Med*.  
355 2010;81: 107–111.

- 356 24. Williams VF, Oh G-T, Stahlman S. Incidence and prevalence of the metabolic syndrome  
357 using ICD-9 and ICD-10 diagnostic codes, active component, U.S. Armed Forces, 2002-  
358 2017. *MSMR*. 2018;25: 20–25.
- 359 25. Reyes-Guzman CM, Bray RM, Forman-Hoffman VL, Williams J. Overweight and obesity  
360 trends among active duty military personnel: a 13-year perspective. *Am J Prev Med*.  
361 2015;48: 145–153. doi:10.1016/j.amepre.2014.08.033
- 362 26. Anderson GB, Bell ML. Heat waves in the United States: mortality risk during heat waves  
363 and effect modification by heat wave characteristics in 43 U.S. communities. *Environ*  
364 *Health Perspect*. 2011;119: 210–218. doi:10.1289/ehp.1002313
- 365



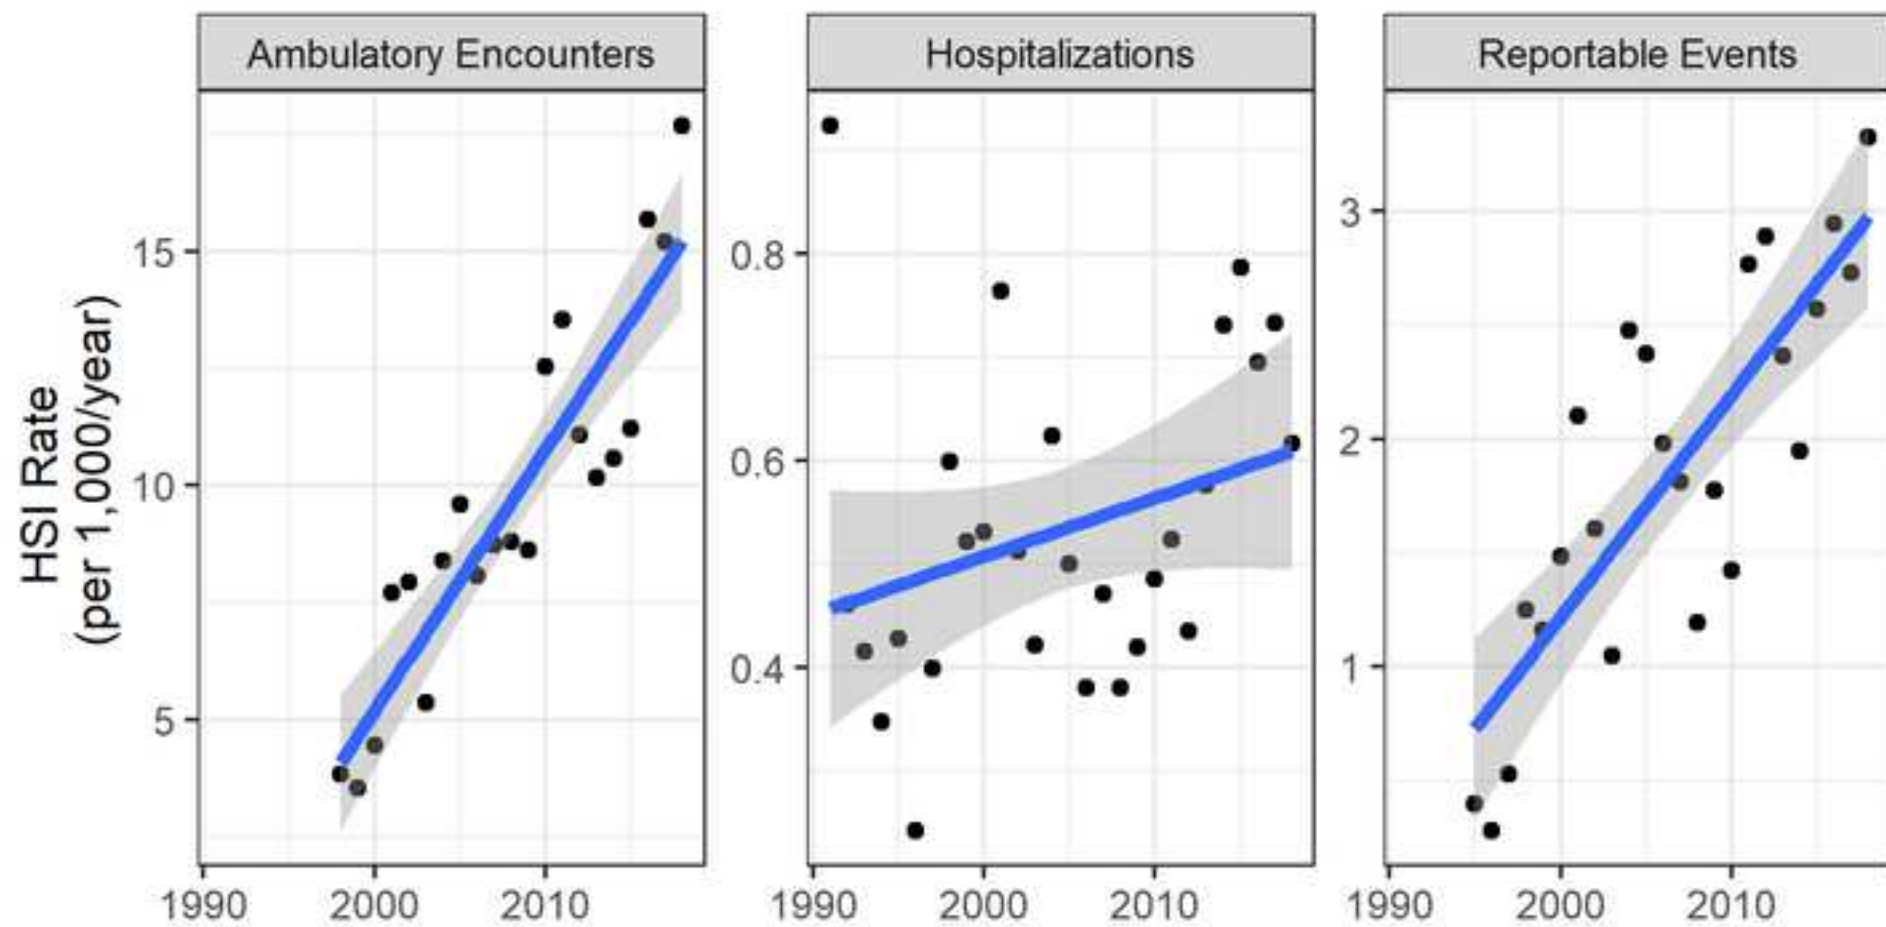

Fig 2

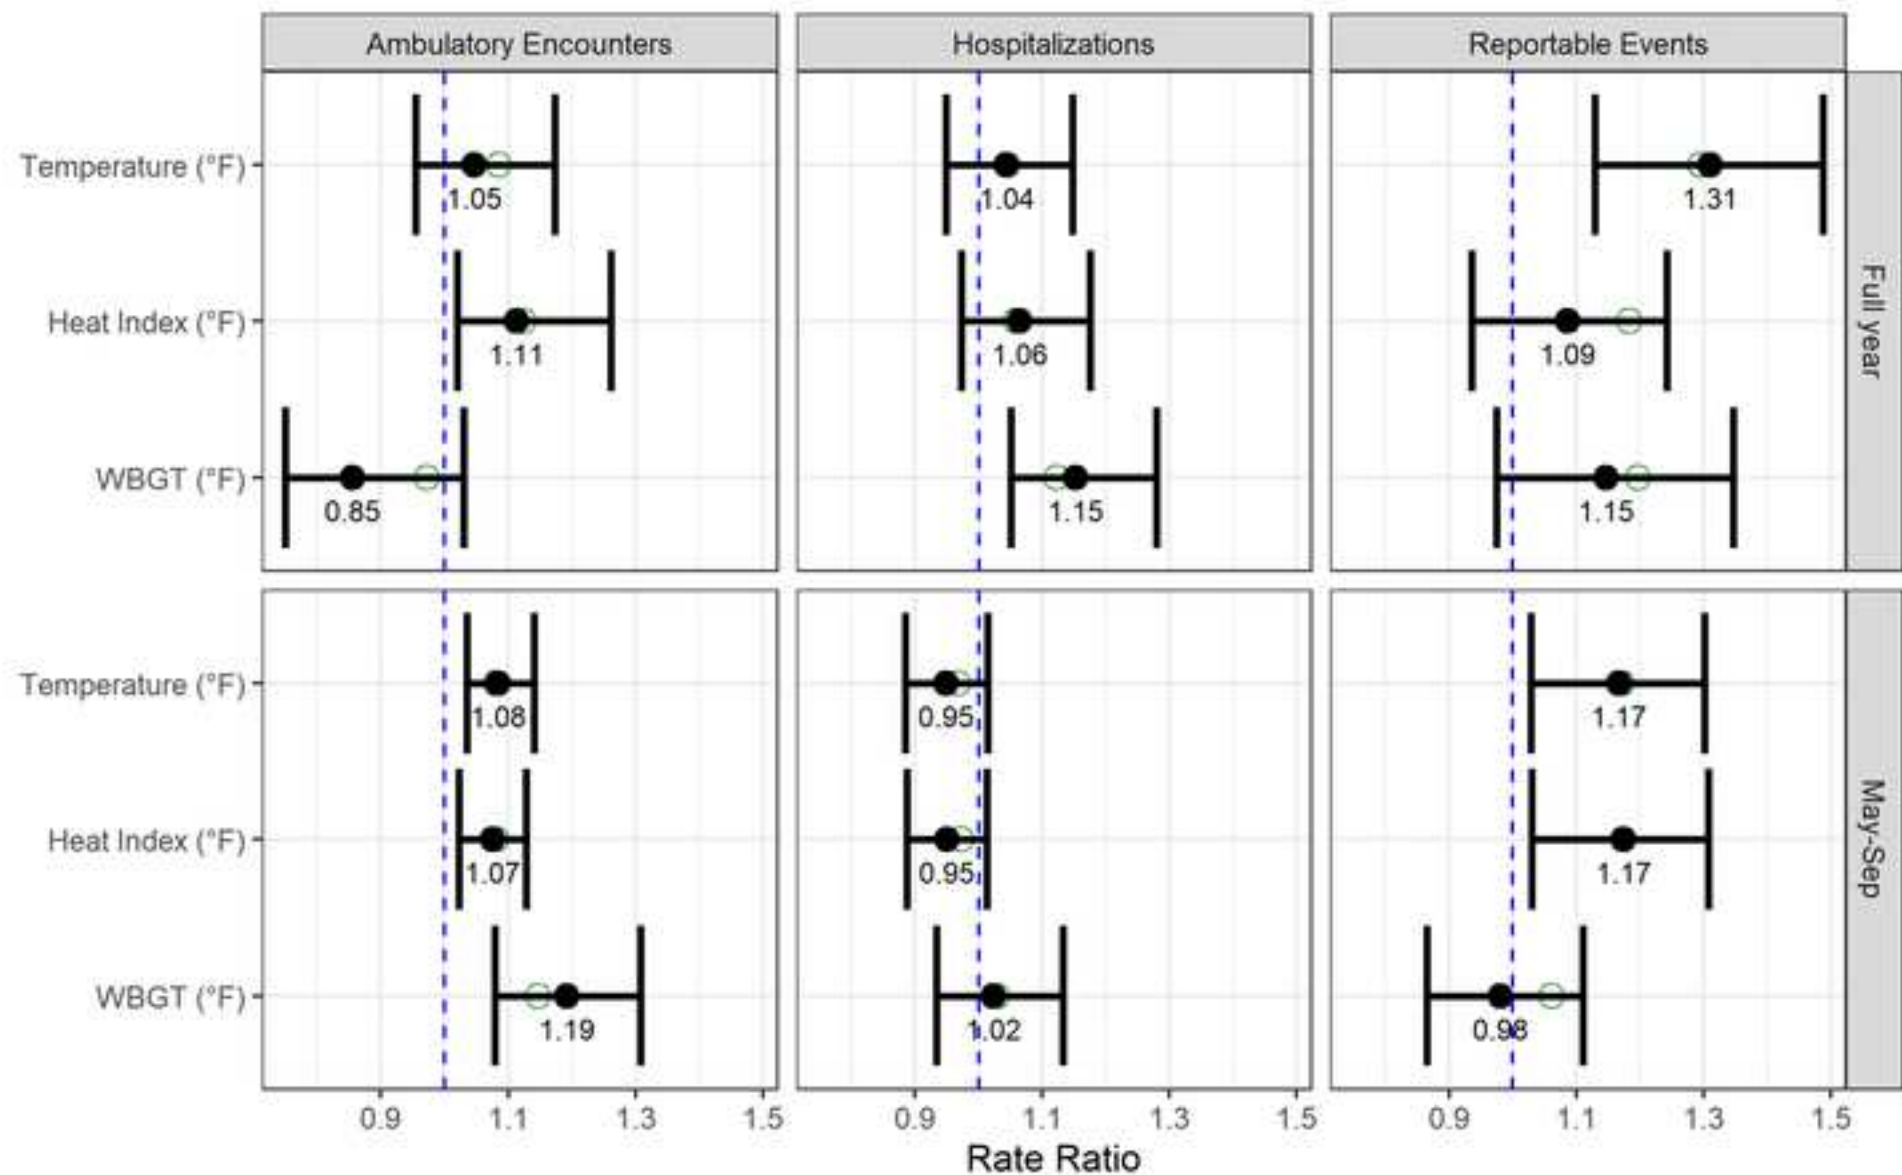

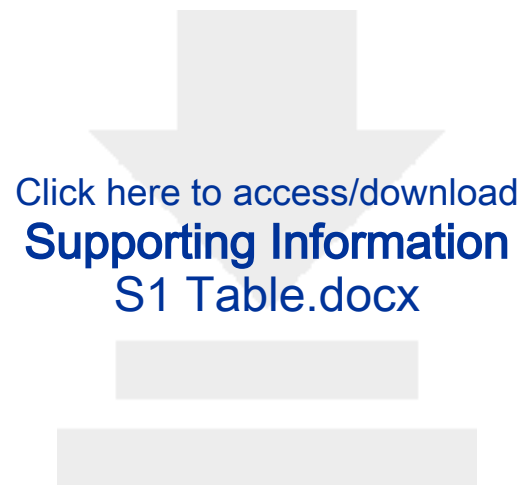

Click here to access/download  
**Supporting Information**  
S1 Table.docx

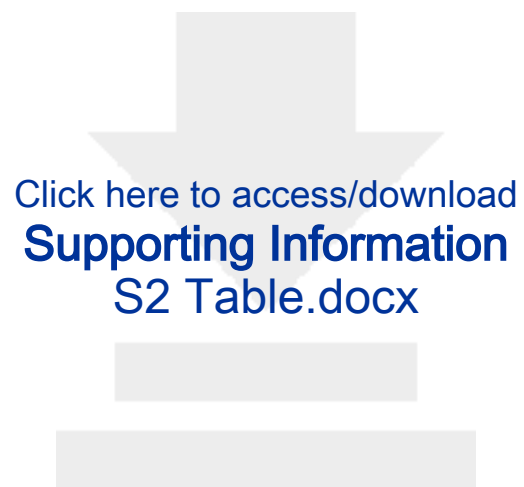

Click here to access/download  
**Supporting Information**  
S2 Table.docx
